# Supplementary material
Source: HighWire-hosted journal article supplement (https://jitc.bmj.com/content/11/4/e006633)
Supplement: inline-supplementary-material-3 [file inline-supplementary-material-3.pdf]

Supplementary Table 2. Patients' characteristics according to TILs, Immunoscoring<sup>®</sup>, Immunoscoring-IC<sup>®</sup> and PDL1-TPS in pMMR subgroup

| Characteristics                    | Population assessed for TILs<br>N=167 |                            |                          | Population assessed for Immunoscoring <sup>®</sup><br>N=69 |                                    |                   | Population assessed for Immunoscoring-IC <sup>®</sup><br>N=147 |                                        |                    | Population assessed for PDL1<br>N=148 |                            |                          |
|------------------------------------|---------------------------------------|----------------------------|--------------------------|------------------------------------------------------------|------------------------------------|-------------------|----------------------------------------------------------------|----------------------------------------|--------------------|---------------------------------------|----------------------------|--------------------------|
|                                    | TILs high<br>N=59<br>n (%)            | TILs low<br>N=108<br>n (%) | <i>p</i>                 | Immunoscoring high<br>N=40<br>n (%)                        | Immunoscoring low<br>N=29<br>n (%) | <i>p</i>          | Immunoscoring-IC high<br>N=47<br>n (%)                         | Immunoscoring-IC low<br>N=100<br>n (%) | <i>p</i>           | PDL1 High<br>N=17<br>n (%)            | PDL1 Low<br>N=131<br>n (%) | <i>p</i>                 |
| <b>Age (years)</b>                 |                                       |                            |                          |                                                            |                                    |                   |                                                                |                                        |                    |                                       |                            |                          |
| <b>Median</b>                      | 58                                    | 62                         | 0.11 <sup>1</sup>        | 62                                                         | 58                                 | 0.11 <sup>1</sup> | 60                                                             | 62                                     | 0.94 <sup>1</sup>  | 56                                    | 62                         | <b>0.019<sup>1</sup></b> |
| <b>Range</b>                       | (20-75)                               | (36-75)                    |                          | (40-75)                                                    | (38-74)                            |                   | (41-75)                                                        | (20-75)                                |                    | (41-71)                               | (20-75)                    |                          |
| <b>Sex</b>                         |                                       |                            |                          |                                                            |                                    |                   |                                                                |                                        |                    |                                       |                            |                          |
| <b>Male</b>                        | 37 (63)                               | 62 (57)                    | 0.50 <sup>2</sup>        | 25 (63)                                                    | 18 (62)                            | 0.97 <sup>2</sup> | 25 (53)                                                        | 65 (65)                                | 0.17 <sup>2</sup>  | 8 (47)                                | 83 (63)                    | 0.20 <sup>2</sup>        |
| <b>Female</b>                      | 22 (37)                               | 46 (43)                    |                          | 15 (37)                                                    | 11 (38)                            |                   | 22 (47)                                                        | 35 (35)                                |                    | 9 (53)                                | 48 (37)                    |                          |
| <b>ECOG-PS</b>                     |                                       |                            |                          |                                                            |                                    |                   |                                                                |                                        |                    |                                       |                            |                          |
| <b>0</b>                           | 49 (83)                               | 93 (86)                    | 0.60 <sup>2</sup>        | 38 (95)                                                    | 24 (83)                            | 0.12 <sup>3</sup> | 42 (89)                                                        | 80 (80)                                | 0.16 <sup>2</sup>  | 15 (88)                               | 108 (82)                   | 0.74 <sup>3</sup>        |
| <b>1-2</b>                         | 10 (17)                               | 15 (14)                    |                          | 2 (5)                                                      | 5 (17)                             |                   | 5 (11)                                                         | 20 (20)                                |                    | 2 (12)                                | 23 (18)                    |                          |
| <b>Site of Primary Tumor</b>       |                                       |                            |                          |                                                            |                                    |                   |                                                                |                                        |                    |                                       |                            |                          |
| <b>Right</b>                       | 26 (44)                               | 41 (38)                    | 0.44 <sup>2</sup>        | 22 (55)                                                    | 12 (41)                            | 0.26 <sup>2</sup> | 20 (43)                                                        | 41 (41)                                | 0.86 <sup>2</sup>  | 5 (29)                                | 56 (43)                    | 0.29 <sup>2</sup>        |
| <b>Left and rectum</b>             | 33 (56)                               | 67 (62)                    |                          | 18 (45)                                                    | 17 (59)                            |                   | 27 (57)                                                        | 59 (59)                                |                    | 12 (71)                               | 75 (57)                    |                          |
| <b>RAS/BRAF mutational status</b>  |                                       |                            |                          |                                                            |                                    |                   |                                                                |                                        |                    |                                       |                            |                          |
| <b>RAS/BRAF wt</b>                 | 7 (12)                                | 18 (17)                    | 0.58 <sup>2</sup>        | 5 (12)                                                     | 5 (17)                             | 0.84 <sup>2</sup> | 8 (17)                                                         | 13 (13)                                | 0.19 <sup>2</sup>  | 1 (6)                                 | 20 (15)                    | 0.32 <sup>2</sup>        |
| <b>RAS mut</b>                     | 45 (76)                               | 80 (75)                    |                          | 30 (75)                                                    | 21 (72)                            |                   | 31 (67)                                                        | 80 (80)                                |                    | 13 (76)                               | 99 (76)                    |                          |
| <b>BRAF mut</b>                    | 7 (12)                                | 9 (8)                      |                          | 5 (12)                                                     | 3 (10)                             |                   | 7 (15)                                                         | 7 (7)                                  |                    | 3 (18)                                | 11 (9)                     |                          |
| <b>NA</b>                          | -                                     | 1                          |                          | -                                                          | -                                  |                   | 1                                                              | -                                      |                    | -                                     | 1                          |                          |
| <b>Resected Primary Tumor</b>      |                                       |                            |                          |                                                            |                                    |                   |                                                                |                                        |                    |                                       |                            |                          |
| <b>Yes</b>                         | 20 (34)                               | 55 (51)                    | <b>0.035<sup>2</sup></b> | 36 (90)                                                    | 28 (97)                            | 0.39 <sup>3</sup> | 17 (36)                                                        | 53 (53)                                | 0.057 <sup>2</sup> | 8 (47)                                | 62 (47)                    | 0.98 <sup>2</sup>        |
| <b>No</b>                          | 39 (66)                               | 53 (49)                    |                          | 4 (10)                                                     | 1 (3)                              |                   | 30 (64)                                                        | 47 (47)                                |                    | 9 (53)                                | 69 (53)                    |                          |
| <b>Prior adjuvant chemotherapy</b> |                                       |                            |                          |                                                            |                                    |                   |                                                                |                                        |                    |                                       |                            |                          |
| <b>Yes</b>                         | 3 (5)                                 | 4 (4)                      | 0.70 <sup>3</sup>        | 2 (5)                                                      | 2 (7)                              | 1.0 <sup>3</sup>  | 1 (2)                                                          | 5 (5)                                  | 0.66 <sup>3</sup>  | 2 (12)                                | 4 (3)                      | 0.14 <sup>3</sup>        |

|                                   |         |          |                    |         |          |                    |         |         |                    |          |          |                   |
|-----------------------------------|---------|----------|--------------------|---------|----------|--------------------|---------|---------|--------------------|----------|----------|-------------------|
| <b>No</b>                         | 56 (95) | 104 (96) |                    | 38 (95) | 27 (93)  |                    | 46 (98) | 95 (95) |                    | 15 (88)  | 127 (97) |                   |
| <b>Number of metastatic sites</b> |         |          |                    |         |          |                    |         |         |                    |          |          |                   |
| <b>1</b>                          | 31 (53) | 40 (37)  | 0.053 <sup>2</sup> | 17 (42) | 12 (41)  | 0.93 <sup>2</sup>  | 22 (47) | 33 (33) | 0.11 <sup>2</sup>  | 8 (47)   | 47 (36)  | 0.37 <sup>2</sup> |
| <b>&gt;1</b>                      | 28 (47) | 68 (63)  |                    | 23 (58) | 17 (59)  |                    | 25 (53) | 67 (67) |                    | 9 (53)   | 84 (64)  |                   |
| <b>Liver Only Disease</b>         |         |          |                    |         |          |                    |         |         |                    |          |          |                   |
| <b>Yes</b>                        | 18 (30) | 28 (26)  | 0.53 <sup>2</sup>  | 9 (22)  | 10 (34)  | 0.27 <sup>2</sup>  | 15 (32) | 24 (24) | 0.31 <sup>2</sup>  | 6 (35)   | 33 (25)  | 0.38 <sup>2</sup> |
| <b>No</b>                         | 41 (70) | 80 (74)  |                    | 31 (78) | 19 (66)  |                    | 32 (68) | 76 (76) |                    | 11 (65)  | 98 (75)  |                   |
| <b>Liver metastases</b>           |         |          |                    |         |          |                    |         |         |                    |          |          |                   |
| <b>Yes</b>                        | 38 (64) | 88 (81)  | 0.015 <sup>2</sup> | 26 (65) | 24 (83)  | 0.092 <sup>2</sup> | 32 (68) | 82 (82) | 0.060 <sup>2</sup> | 15 (88)  | 99 (76)  | 0.36 <sup>3</sup> |
| <b>No</b>                         | 21 (36) | 20 (19)  |                    | 14 (35) | 5 (17)   |                    | 15 (32) | 18 (18) |                    | 2 (12)   | 32 (24)  |                   |
| <b>Time to Metastases</b>         |         |          |                    |         |          |                    |         |         |                    |          |          |                   |
| <b>Synchronous</b>                | 51 (86) | 16 (15)  | 0.83 <sup>2</sup>  | 26 (65) | 24 (83)  | 0.10 <sup>2</sup>  | 40 (85) | 84 (84) | 0.86 <sup>2</sup>  | 14 (82)  | 111 (85) | 0.73 <sup>3</sup> |
| <b>Metachronous</b>               | 8 (14)  | 92 (85)  |                    | 14 (35) | 5 (17)   |                    | 7 (15)  | 16 (16) |                    | 3 (18)   | 20 (15)  |                   |
| <b>Treatment arm</b>              |         |          |                    |         |          |                    |         |         |                    |          |          |                   |
| <b>FOLFOXIRI/bev</b>              | 16 (27) | 44 (41)  | 0.080 <sup>2</sup> | 10 (25) | 10 (34)  | 0.39 <sup>2</sup>  | 16 (34) | 36 (36) | 0.82 <sup>2</sup>  | 5 (29)   | 47 (36)  | 0.60 <sup>2</sup> |
| <b>FOLFOXIRI/bev/atezo</b>        | 43 (73) | 64 (59)  |                    | 30 (75) | 19 (66)  |                    | 31 (66) | 64 (64) |                    | 12 (71)  | 84 (34)  |                   |
| <b>Tumour mutational burden</b>   |         |          |                    |         |          |                    |         |         |                    |          |          |                   |
| <b>High (≥10 mut/Mb)</b>          | 2 (5)   | 4 (5)    | 1.0 <sup>3</sup>   | 4 (12)  | -        | 0.13 <sup>3</sup>  | 5 (17)  | 2 (2)   | 0.016 <sup>3</sup> | -        | 7 (7)    | 1.0 <sup>3</sup>  |
| <b>Low (&lt;10 mut/Mb)</b>        | 36 (95) | 77 (95)  |                    | 30 (88) | 25 (100) |                    | 25 (83) | 78 (98) |                    | 11 (100) | 92 (93)  |                   |
| <b>NA</b>                         | 21      | 27       |                    | 6       | 4        |                    | 17      | 20      |                    | 6        | 32       |                   |

**Legend:** pMMR: proficient mismatch repair; N: number; TPS: Tumor Proportion Score; PDL1: Programmed death-ligand 1; ECOG-PS: Eastern Cooperative Oncology Group Performance Status; NA: not available; mut: mutated; wt: wild-type.

<sup>1</sup>Kruskal-Wallis p-value; <sup>2</sup>Chi-Square p-value; <sup>3</sup>Fisher p-value;
